# Supplementary material
Source: HighWire-hosted journal article supplement (https://cmaj.ca/highwire/filestream/149797/field_highwire_adjunct_files/0/230227-five-1-at.pdf)
Supplement: 230227-five-1-at.pdf [file 230227-five-1-at.pdf]

Online Supplementary Appendix

**Table 1 – Antipsychotic medications used for hyperactive delirium in older adults**

| Drug               | Class             | Starting Doses | Routes                    | Sedation | Risk of EPS | Anticholinergic activity |
|--------------------|-------------------|----------------|---------------------------|----------|-------------|--------------------------|
| <b>Quetiapine</b>  | Second Generation | 6.25 – 12.5 mg | Oral                      | High     | Low         | Moderate <sup>†</sup>    |
| <b>Risperidone</b> | Second Generation | 0.25 – 0.5 mg  | Oral                      | Low      | High        | Moderate                 |
| <b>Olanzapine</b>  | Second Generation | 1.25 – 2.5 mg  | Oral, IM                  | High     | Moderate    | High                     |
| <b>Haloperidol</b> | First Generation  | 0.25 – 0.5 mg  | Oral, IM, IV <sup>‡</sup> | Low      | High        | Low                      |
| <b>Loxapine</b>    | First Generation  | 10 mg          | Oral, IM                  | High     | Moderate    | Moderate                 |

IM=intramuscular, IV=intravenous, EPS=extrapyramidal symptoms.

<sup>†</sup>At high doses (>100 mg) not typically used for delirium. <sup>‡</sup> Substantial risk of QT prolongation with IV use.

**Table was created by authors with information sourced from:**

- 1) Marcantonio ER. Delirium in Hospitalized Older Adults. *New England Journal of Medicine*. 2017;377(15):1456-1466
- 2) Use of Antipsychotics in Behavioural and Psychological Symptoms of Dementia (BPSD) Discussion Guide. Centre for Effective Practice. Updated April 2016. Accessed April 3, 2023. [https://cep.health/media/uploaded/UseofAntipsychotics\\_LTC2016-2.pdf](https://cep.health/media/uploaded/UseofAntipsychotics_LTC2016-2.pdf)
